## Table of Contents

|                                                                                                                                     |     |
|-------------------------------------------------------------------------------------------------------------------------------------|-----|
| <b>Andreas Christmann and Robert Gleave</b>                                                                                         |     |
| Introduction                                                                                                                        | ix  |
| <b>G. Rex Smith</b>                                                                                                                 |     |
| Colin Imber                                                                                                                         | xi  |
| <b>Colin Imber: Publications</b>                                                                                                    | xv  |
| <b>Murteza Bedir</b>                                                                                                                |     |
| Bukharan Hanafism and the Mashayikh: An Analysis through the Law of Waqf as Expounded by Burhan al-Shari'a al-Bukhari (d. 616/1219) | 1   |
| <b>Ron Buckley</b>                                                                                                                  |     |
| The Isra'/Mi'raj and the Prescription of the Five Daily Prayers                                                                     | 23  |
| <b>Andreas Christmann</b>                                                                                                           |     |
| A Plea for Circumstantial Innocence: Muhammad Sa'id Ramadan al-Buti's Defence of Roger Garaudy                                      | 51  |
| <b>Robert Gleave</b>                                                                                                                |     |
| Questions and Answers on Akhbari Jurisprudence: The <i>Jawabat al-Masa'il al-Zahiriyya</i> of Muhammad Amin al-Astarabadi           | 73  |
| <b>Gerald Hawting</b>                                                                                                               |     |
| The Juristic Dispute about the Legal Status of the Animal Offerings on the Feast of Sacrifices                                      | 123 |
| <b>Baber Johansen</b>                                                                                                               |     |
| Can the Law Decide that Egypt is Conquered by Force? A Thirteenth-Century Debate on History as an Object of Law                     | 143 |
| <b>Evgenia Kermeli</b>                                                                                                              |     |
| The Right to Choice: Ottoman Justice vis-à-vis Ecclesiastical and Communal Justice in the Balkans, Seventeenth-Nineteenth Centuries | 165 |
| <b>Rudolph Peters</b>                                                                                                               |     |
| Between Paris, Istanbul and Cairo: The Origins of Criminal Legislation in Late Ottoman Egypt (1829–58)                              | 211 |
| <b>Ulrich Rebstock</b>                                                                                                              |     |
| <i>Homo ludens</i> at Work: Mauritanians' Skills in Determining Inheritance Shares ( <i>farā'id</i> )                               | 233 |
| <b>Kevin Reinhart</b>                                                                                                               |     |
| Mollā Hüsrev: Ottoman Jurist and <i>usūlī</i>                                                                                       | 245 |
| <b>Mona Siddiqui</b>                                                                                                                |     |
| Drinking and Drunkenness in Ibn Rushd                                                                                               | 281 |
| <b>Christine Woodhead</b>                                                                                                           |     |
| After Celalzade: The Ottoman Nişancı c. 1560–1700                                                                                   | 295 |
| <b>Elizabeth A. Zachariadou</b>                                                                                                     |     |
| Pacts and Some Facts                                                                                                                | 313 |
